# Supplementary material
Source: PubMed Central journal article supplement (PMC8042493)
Supplement: mmc1.pdf [file mmc1.pdf]

|                |
|----------------|
| User agreement |
| Special Terms  |

**Mapi Research Trust**, a non-for-profit organisation subject to the terms of the French law of 1st July 1901, registered in Carpentras under number 453 979 346, whose business address is 27 rue de la Villette, 69003 Lyon, France, hereafter referred to as “MRT” and the User, as defined herein, (each referred to singularly as a “Party” and/or collectively as the “Parties”), do hereby agree to the following User Agreement Special and General Terms:

Mapi Research Trust  
 PROVIDE™  
 27 rue de la Villette  
 69003 Lyon  
 France  
 Phone: +33 (0)4 72 13 66 66

**Recitals**

The User acknowledges that it is subject to these Special Terms and to the General Terms of the Agreement, which are included in Appendix 1 to these Special Terms and fully incorporated herein by reference. Under the Agreement, the Questionnaire referenced herein is licensed, not sold, to the User by MRT for use only in accordance with the terms and conditions defined herein. MRT reserves all rights not expressly granted to the User.

The Parties, in these Special Terms, intend to detail the special conditions of their partnership.

The Parties intend that all capitalized terms in the Special Terms have the same definitions as those given in article 1 of the General Terms included in Appendix 1.

In this respect, the Parties have agreed as follows:

**Article 1. Conditions Specific to the User**

**Section 1.01 Identification of the User**

|                  |                                                                                            |
|------------------|--------------------------------------------------------------------------------------------|
| User Name        | Deepa Bhat                                                                                 |
| Legal Form       | University/Hospital                                                                        |
| Address          | Associate Professor Department of Anatomy JSS Medical College Bannimantap<br>570015 Mysore |
| Country          | India                                                                                      |
| Email address    | deepavijaybhat@gmail.com                                                                   |
| Telephone number | 9448413277                                                                                 |

**Section 1.02 Identification of the Questionnaire**

|       |                                                |
|-------|------------------------------------------------|
| Title | Pediatric Quality of Life Inventory™ (PedsQL™) |
|-------|------------------------------------------------|

Pediatric Quality of Life Inventory™\_UserAgreement\_March2016\_22.0

|                                   |                                                      |
|-----------------------------------|------------------------------------------------------|
| Author(s)                         | Varni James W                                        |
| Owner                             | Varni James W, PhD                                   |
| Copyright                         | Copyright © 1998 JW Varni, Ph.D. All rights reserved |
| Original bibliographic references | See Appendix 2                                       |

## Article 2. Rights to Use

### Section 2.01 Context of the Use of the Questionnaire

The User undertakes to only use the Questionnaire in the context of the Study as defined hereafter.

|                                                             |                                                                                                 |
|-------------------------------------------------------------|-------------------------------------------------------------------------------------------------|
| Context of Use                                              | Clinical project or study                                                                       |
| Title                                                       | Study of quality of life and coping strategies among parents with Downs child in Indian context |
| Disease or condition                                        | Downs syndrome                                                                                  |
| Type of research                                            | Epidemiologic/Observational                                                                     |
| Questionnaire used as primary endpoint                      | Yes                                                                                             |
| Number of patients expected                                 | 50                                                                                              |
| Number of submissions to the questionnaire for each patient | 01                                                                                              |
| Term of clinical follow-up for each patient                 | 1 year                                                                                          |
| Start                                                       | 01/2018                                                                                         |
| End                                                         | 12/2018                                                                                         |
| Mode of administration                                      | Paper administration                                                                            |

### Section 2.02 Conditions for Use

The User undertakes to use the Questionnaire in accordance with the conditions for use defined hereafter.

#### (a) Rights transferred

Acting in the Owner's name, MRT transfers the following limited, non-exclusive rights, to the User (the "Limited Rights")

(i) to use the Questionnaire, only as part of the Study; this right is made up exclusively of the right to communicate it to the Beneficiaries only, free of charge, by any means of communication and by any means of remote distribution known or unknown to date, subject to respecting the conditions for use described hereafter; and

(ii) to reproduce the Questionnaire, only as part of the Study; this right is made up exclusively of the right to physically establish the Questionnaire or to have it physically established, on any paper, electronic, analog or digital medium, and in particular documents, articles, studies, observations, publications, websites whether or not protected by restricted access, CD, DVD, CD-ROM, hard disk, USB flash drive, for the Beneficiaries only and subject to respecting the conditions for use described hereafter; and

(iii) Should the Questionnaire not already have been translated into the language requested, the User is entitled to

translate the Questionnaire or have it translated in this language, subject to informing MRT of the same beforehand by the signature of a Translation Agreement indicating the terms of it and to providing a copy of the translation thus obtained as soon as possible to MRT.

The User acknowledges and accepts that it is not entitled to amend, modify, condense, adapt, reorganise the Questionnaire on any medium whatsoever, in any way whatsoever, even minor, without MRT's prior specific written consent.

(b) Specific conditions for the Owner

The Owner has intended to transfer a part of the copyright on the Questionnaire and/or the Documentation to MRT in order to enable MRT to make it available to the User for the purpose of the Study, subject to the User respecting the following conditions:

User shall not modify, abridge, condense, translate, adapt, recast or transform the Questionnaire in any manner or form, including but not limited to any minor or significant change in wordings or organisation in the Questionnaire, without the prior written agreement of the Owner. If permission is granted, any improvements, modifications, or enhancements to the Questionnaire which may be conceived or developed, including translations and modules, shall become the property of the Owner.

The User therefore undertakes to respect these special terms.

(c) Specific conditions for the Questionnaire

- Use in Individual clinical practice or Research study / project

The User undertakes never to duplicate, transfer or publish the Questionnaire without indicating the Copyright Notice.

In the case of use of an electronic version of the Questionnaire in academic studies, the User undertakes to respect the following special obligations:

- In case of use of an IT Company (e-vendor), User shall check with Mapi Research Trust that IT Company has signed the necessary License Agreement with Mapi Research Trust before developing the electronic version of the Questionnaire
- Not modify the questionnaire (items and response scales, including the response scale numbers from 0-4)
- Cite the reference publications
- Insert the Owner's copyright notice on all pages/screens on which the Questionnaire will be presented and insert the Trademark information: PedsQL<sup>TM</sup>, Copyright © 1998 JW Varni, Ph.D. All rights reserved.
- Mention the following information: "PedsQL<sup>TM</sup> contact information and permission to use: Mapi Research Trust, Lyon, France – Internet: <https://eprovide.mapi-trust.org> and [www.pedsq.org/index.html](http://www.pedsq.org/index.html) "
- Submit the screenshots of all the Pages where the Questionnaire appears to Dr James W. Varni before release for approval and to check that the above-mentioned requirements have been respected.

In the case of use of an electronic version of the Questionnaire in commercial studies / projects, the User undertakes to respect the following special obligations:

User shall:

- In case of use of an IT Company (e-vendor), User shall check with Mapi Research Trust that IT Company has signed the necessary License Agreement with Mapi Research Trust before developing the electronic version of the Questionnaire
- Not modify the questionnaire (items and response scales, including the response scale numbers from 0-4)
- Cite the reference publications
- Insert the Owner's copyright notice on all pages/screens on which the Questionnaire will be presented and insert the Trademark information: PedsQL<sup>TM</sup>, Copyright © 1998 JW Varni, Ph.D. All rights reserved.
- Mention the following information: "PedsQL<sup>TM</sup> contact information and permission to use: Mapi Research Trust, Lyon, France – Internet: <https://eprovide.mapi-trust.org> and [www.pedsq.org/index.html](http://www.pedsq.org/index.html) "

- For the first migration of the Questionnaire (generally the original version) into a specific electronic device

- Review of screenshots:

After implementation of the Questionnaire into the device, the user/IT Company will generate screen captures (screenshots) of the original questionnaire as displayed in the device. These will be reviewed by Mapi to check that they are consistent with the original paper version in terms of presentation, content and completion except for specific instructions related to the electronic administration. Corrections that may be needed will be reported to the user/IT Company. In this case, screenshots after correction will be generated for another round of review by Mapi until all screenshots are approved.

Dr James W. Varni will review all approved screenshots for a final validation.

- Usability testing:

Usability testing is a methodology which aims to examine whether respondents are able to use a device and associated software as intended. Major issues of concern in usability testing typically include device complexity, navigation and response selection for example.

The objective of this investigation is to ensure that the electronic version of the questionnaire as included in the device meets usability criteria, focusing on functional aspects and respondents' understanding of instructions. Usability testing consists in interviews with patients where patients will complete the electronic version of the Questionnaire on the device and comment on their understanding of the instructions, ease of use and handiness of the device. A Usability testing report presenting results will be produced. If any changes are recommended, these will be implemented by the user/IT Company. If issues raised by respondents are rated as major, the user/IT Company may need to perform additional developments and another round of interviews may be needed.

Dr James W. Varni will review the changes suggested, if any, following the interviews.

The review of screenshots is mandatory. The usability testing is highly recommended by Mapi, however should the User and/or IT Company decide not to perform this step, Mapi Research Trust shall not be held responsible for any consequence and expense associated with this decision which shall remain the User and/or IT Company's sole liability.

The review of screenshots and usability testing, when and if performed, shall be performed exclusively by Mapi and shall be sponsored by the User.

The performance of the review of screenshots and usability testing will result in a certification of the electronic device original version of the Questionnaires by Mapi for future licenses.

- For the migration of other language versions of the Questionnaire on an existing certified specific electronic device

- Update version

After the electronic device original version of the Questionnaire is fully ready, the Questionnaire's language versions developed for paper administration will be updated to reflect the changes in wording of instructions implemented in the electronic device original version of the questionnaire.

Native speakers of the languages will reflect the changes made to the electronic device original version of the Questionnaire and will provide English equivalents of all changes made for Mapi's quality control.

- Review of screenshots:

After implementation of the Questionnaire into the device, the user/IT Company will generate screen captures (screenshots) of the original questionnaire as displayed in the device. These will be reviewed by Mapi to check that they are consistent with the original paper version in terms of presentation, content and completion except for specific instructions related to the electronic administration. Corrections that may be needed will be reported to the user/IT Company. In this case, screenshots after correction will be generated for another round of review by Mapi until all screenshots are approved.

The update of version and review of screenshots are mandatory. These steps shall be performed exclusively by Mapi and shall be sponsored by the User.

The performance of the update of version and review of screenshots will result in a certification of the electronic device language version of the Questionnaires by Mapi for future licenses.

- Use in a publication:

In the case of a publication, article, study or observation on paper or electronic format of the Questionnaire, the User undertakes to respect the following special obligations:

- not to include any full copy of the Questionnaire, but a version with the indication "sample copy, do not use without permission"
- to indicate the name and copyright notice of the Owner (PedsQL<sup>TM</sup>, Copyright © 1998 JW Varni, Ph.D. All rights reserved)
- to include the reference publications of the Questionnaire
- to indicate the details of MRT for any information on the Questionnaire as follows: "PedsQL<sup>TM</sup> contact information and permission to use: Mapi Research Trust, Lyon, France. – Internet: <https://eprovide.mapi-trust.org> and [www.pedsq.org](http://www.pedsq.org) "
- to provide MRT, as soon as possible, with a copy of any publication regarding the Questionnaire, for information purposes
- to submit the screenshots of all the Pages where the Questionnaire appears to MRT before release to check that the above-mentioned requirements have been respected.

- Use for dissemination or marketing:

In the case of use in a dissemination/marketing context:

- On a website with unrestricted access:

The publication of a copy of the PedsQL<sup>TM</sup> on a website with unrestricted access is not permitted.

- On a website with restricted access:

In the case of publication on a website with restricted access, the User may include a version of the Questionnaire that may be amended, subject to this version being protected by a sufficiently secure access to only allow the Beneficiaries to access it.

### **Article 3. Term**

MRT transfers the Limited Rights to use the Questionnaire as from the date of delivery of the Questionnaire to the User and for the whole period of the Study.

### **Article 4. Beneficiaries**

The Parties agree that the User may communicate the Questionnaire in accordance with the conditions defined above to the Beneficiaries involved in the Study only, in relation to the Study defined in section 2.01.

## Article 5. Territories and Languages

MRT transfers the Limited Rights to use the Questionnaire on the following territories and in the languages indicated in the table below:

| Questionnaire                    | Language            |
|----------------------------------|---------------------|
| PedsQL™ Family Impact module     | English for the USA |
| PedsQL™ General Well-Being Scale | English for the USA |
| PedsQL™ Generic Core Scales      | English for India   |

## Article 6. Price and Payment Terms

The User undertakes in relation to MRT to pay the price owed in return for the availability of the Questionnaire, according to the prices set out below, depending on the languages requested and the costs of using the Questionnaire, in accordance with the terms and conditions described in section 6.02 of the General Terms included in Appendix 1.

Access to the Questionnaire in non-funded academic research and individual clinical practice is free of charge.

*Agreed and acknowledged by*

Deepa Bhat

13-Dec-2017

Appendix 1 to the Special Terms: User Agreement General Terms

User has read and accepted the Mapi's General Terms of the Agreement, which are available on MRT's website:

<https://eprovide.mapi-trust.org/user-agreement-general-terms>

Appendix 2 to the Special Terms: References

Generic Core Scales:

---

Pediatric Quality of Life Inventory™\_UserAgreement\_March2016\_22.0

© Mapi Research Trust. The unauthorized modification and use of any portion of this document is prohibited.

- Varni JW, et al. The PedsQL™: Measurement Model for the Pediatric Quality of Life Inventory. *Medical Care*, 1999; 37(2):126-139
- Varni, J.W., et al. The PedsQL™ 4.0: Reliability and validity of the Pediatric Quality of Life Inventory™ Version 4.0 Generic Core Scales in healthy and patient populations. *Medical Care*, 2001; 39(8): 800-812.
- Varni, J.W., et al. (2002). The PedsQL™ 4.0 Generic Core Scales: Sensitivity, responsiveness, and impact on clinical decision-making. *Journal of Behavioral Medicine*, 25, 175-193.
- Varni, J.W., et al. (2003). The PedsQL™ 4.0 as a pediatric population health measure: Feasibility, reliability, and validity. *Ambulatory Pediatrics*, 3, 329-341.
- Chan, K.S., Mangione-Smith, R., Burwinkle, T.M., Rosen, M., &&& Varni, J.W. (2005). The PedsQL™: Reliability and validity of the Short-Form Generic Core Scales and Asthma Module. *Medical Care*, 43, 256-265.
- Varni, J.W., &&& Limbers, C.A. (2009). The PedsQL™ 4.0 Generic Core Scales Young Adult Version: Feasibility, reliability and validity in a university student population. *Journal of Health Psychology*, 14, 611-622.

#### Asthma Module:

- Varni, J.W., Burwinkle, T.M., Rapoff, M.A., Kamps, J.L., &&& Olson, N. The PedsQL™ in pediatric asthma: Reliability and validity of the Pediatric Quality of Life Inventory™ Generic Core Scales and Asthma Module. *Journal of Behavioral Medicine*, 2004; 27:297-318.
- Chan, K.S., Mangione-Smith, R., Burwinkle, T.M., Rosen, M., &&& Varni, J.W. (2005). The PedsQL™: Reliability and validity of the Short-Form Generic Core Scales and Asthma Module. *Medical Care*, 43, 256-265.

#### Brain Tumor Module:

- Palmer, S.N., Meeske, K.A., Katz, E.R., Burwinke, T.M., &&& Varni, J.W. (2007). The PedsQL™ Brain Tumor Module: Initial reliability and validity. *Pediatric Blood and Cancer*, 49, 287-293.

#### Cancer Module:

- Varni, J.W., Burwinkle, T.M., Katz, E.R., Meeske, K., &&& Dickinson, P. The PedsQL™ in pediatric cancer: Reliability and validity of the Pediatric Quality of Life Inventory™ Generic Core Scales, Multidimensional Fatigue Scale, and Cancer Module. *Cancer*, 2002; 94: 2090-2106.
- Robert RS, Paxton RJ, Palla SL, Yang G, Askins MA, Joy SE, Ater JL. Feasibility, reliability, and validity of the pediatric quality of life inventory™ generic core scales, cancer module, and multidimensional fatigue scale in long-term adult survivors of pediatric cancer. *Pediatric Blood &&& Cancer* 2012;59:703–707.

Cerebral Palsy Module:

- Varni JW, Burwinkle TM, Berrin SJ, Sherman SA, Artavia K, Malcarne VL, Chambers HG (2006). The PedsQL<sup>TM</sup> in Pediatric Cerebral Palsy: Reliability, Validity, and Sensitivity of the Generic Core Scales and Cerebral Palsy Module. *Developmental Medicine and Child Neurology*, 48: 442-449.

Cardiac Module:

- Uzark, K., Jones, K., Burwinkle, T.M., &&& Varni, J.W. The Pediatric Quality of Life Inventory<sup>TM</sup> in children with heart disease. *Progress in Pediatric Cardiology*, 2003; 18:141-148.
- Uzark, K., Jones, K., Slusher, J., Limbers, C.A., Burwinkle, T.M., &&& Varni, J.W. (2008). Quality of life in children with heart disease as perceived by children and parents. *Pediatrics*, 121, e1060-e1067.

Cognitive Functioning Scale:

- McCarthy, M.L., MacKenzie, E.J., Durbin, D.R., Aitken, M.E., Jaffe, K.M., Paidas, C.N. et al. (2005). The Pediatric Quality of Life Inventory: An evaluation of its reliability and validity for children with traumatic brain injury. *Archives of Physical Medicine and Rehabilitation*, 86, 1901-1909.
- Varni, J.W., Burwinkle, T.M., Katz, E.R., Meeske, K., &&& Dickinson, P. (2002). The PedsQL<sup>TM</sup> in pediatric cancer: Reliability and validity of the Pediatric Quality of Life Inventory Generic Core Scales, Multidimensional Fatigue Scale, and Cancer Module. *Cancer*, 94, 2090-2106.
- Varni, J.W., Limbers, C.A., Sorensen, L.G., Neighbors, K., Martz, K., Bucuvalas, J.C., &&& Alonso, E.M. (2011). PedsQL<sup>TM</sup> Cognitive Functioning Scale in pediatric liver transplant recipients: Feasibility, reliability and validity. *Quality of Life Research*, 20, 913-921.

Diabetes Module:

- Varni, J.W., Curtis, B.H., Abetz, L.N., Lasch, K.E., Piauult, E.C., &&& Zeytoonjian, A.A. (2013). Content validity of the PedsQL<sup>TM</sup> 3.2 Diabetes Module in newly diagnosed patients with Type 1 Diabetes Mellitus ages 8-45. *Quality of Life Research*. 22, 2169-2181.
- Varni, J.W., Burwinkle, T.M., Jacobs, J.R., Gottschalk, M., Kaufman, F., &&& Jones, K.L. The PedsQL<sup>TM</sup> in Type 1 and Type 2 diabetes: Reliability and validity of the Pediatric Quality of Life Inventory<sup>TM</sup> Generic Core Scales and Type 1 Diabetes Module. *Diabetes Care*, 2003; 26: 631-637.
- Nansel, T.R., Weisberg-Benchell, J., Wysocki, T., Laffel, L. &&& Anderson, B. (2008). Quality of life in children with Type 1 diabetes: A comparison of general and disease-specific measures and support for a unitary diabetes quality of life construct. *Diabetic Medicine*, 25, 1316-1323.
- Naughton, M.J., Ruggiero, A.M., Lawrence, J.M., Imperatore, G., Klingensmith, G.J. Waitzfelder, B., McKeown, R.E., Standiford, D.A., Liese, A.D., &&& Loots, B. (2008). Health-related quality of life of children and adolescents with type 1 or type 2 diabetes mellitus: SEARCH for Diabetes In Youth Study. *Archives of Pediatrics and Adolescent Medicine*, 162, 649-657.



- Hilliard, M.E., Lawrence, J.M., Modi, A.C., Anderson, A., Crume, T., Dolan, L.M., Merchant, A.T., Yi-Frazier, J.P., &&& Hood, K.K. (2013). Identification of minimal clinically important difference scores of the Pediatric Quality of Life Inventory in children, adolescents, and young adults with Type 1 and Type 2 diabetes. *Diabetes Care*, 36, 1891–1897.

Duchenne Muscular Dystrophy Module:

- Uzark, K., King, E., Cripe, L., Spicer, R., Sage, J., Kinnett, K., Wong, B., Pratt, J., &&& Varni, J.W. (2012). Health-related quality of life in children and adolescents with Duchenne Muscular Dystrophy. *Pediatrics*, 130, e1559-e1566.

-

End Stage Renal Disease Module:

- Goldstein, S.L., Graham, N., Warady, B.A., Seikaly, M., McDonald, R., Burwinkle, T.M., Limbers, C.A., &&& Varni, J.W. (2008). Measuring health-related quality of life in children with ESRD: Performance of the Generic and ESRD-Specific Instrument of the Pediatric Quality of Life Inventory<sup>TM</sup> (PedsQL<sup>TM</sup>). *American Journal of Kidney Diseases*, 51, 285-297.

Eosinophilic Esophagitis:

- Franciosi, J.P., Hommel, K.A., Bendo, C.B., King, E.C., Collins, M.H., Eby, M.D., Marsolo, K., Abonia, J.P., von Tiehl, K.F., Putnam, P.E., Greenler, A.J., Greenberg, A.B., Bryson, R.A., Davis, C.M., Olive, A.P., Gupta, S.K., Erwin, E.A., Klinnert, M.D., Spergel, J.M., Denham, J.M., Furuta, G.T., Rothenberg, M.E., &&& Varni, J.W. (2013). PedsQL<sup>TM</sup> Eosinophilic Esophagitis Module: Feasibility, reliability and validity. *Journal of Pediatric Gastroenterology &&& Nutrition*, 57, 57-66.

- Franciosi, J.P., Hommel, K.A., Greenberg, A.B., Debrosse, C.W., Greenler, A.J., Abonia, J.P., Rothenberg, M.E., &&& Varni, J.W. (2012). Development of the Pediatric Quality of Life Inventory<sup>TM</sup> Eosinophilic Esophagitis Module items: Qualitative methods. *BMC Gastroenterology*, 12:135, 1-8.

- Franciosi J.P., Hommel, K.A., Debrosse, C.W., Greenberg, A.B., Greenler, A.J., Abonia, J.P., Rothenberg, M.E., &&& Varni, J.W. (2012). Quality of life in paediatric eosinophilic oesophagitis: What is important to patients? *Child: Care, Health and Development*, 38, 477–483.

Family impact Module:

- Varni, J.W., Sherman, S.A., Burwinkle, T.M., Dickinson, P.E., &&& Dixon, P. (2004). The PedsQL<sup>TM</sup> Family Impact Module: Preliminary reliability and validity. *Health and Quality of Life Outcomes*; 2 (55), 1-6.

- Medrano, G.R., Berlin, K.S., &&& Davies, W.H. (2013). Utility of the PedsQL<sup>TM</sup> Family Impact Module: Assessing the psychometric properties in a community sample. *Quality of Life Research*. 22, 2899-2907.

- Jiang, X., Sun, L., Wang, B., Yang, X., Shang, L., &&& Zhang, Y. (2013). Health-related quality of life among children with recurrent respiratory tract infections in Xi'an, China. *PLoS One*, 8(2): e56945.
- Mano, K.E., Khan, K.A., Ladwig, R.J., &&& Weisman, S.J. (2011). The impact of pediatric chronic pain on parents' health-related quality of life and family functioning: Reliability and validity of the PedsQL 4.0 Family Impact Module. *Journal of Pediatric Psychology*, 36, 517-527.

#### Gastrointestinal Symptoms Module:

- Varni, J.W., Bendo, C.B., Denham, J., Shulman, R.J., Self, M.M., Neigut, D.A., Nurko S., Patel, A.S, Franciosi, J.P., Saps, M., Verga, B., Smith, A., Yeckes, A., Heinz, N., Langseder, A., Saeed, S., Zacur, G.M., &&& Pohl, J.F. (in press). PedsQL™ Gastrointestinal Symptoms Module: Feasibility, reliability, and validity. *Journal of Pediatric Gastroenterology &&& Nutrition*.
- Varni, J.W., Bendo, C.B., Denham, J., Shulman, R.J., Self, M.M., Neigut, D.A., Nurko, S., Patel, A.S, Franciosi, J.P., Saps, M., Yeckes, A., Langseder, A., Saeed, S., &&& Pohl, J.F. (in press). PedsQL™ Gastrointestinal Symptoms Scales and Gastrointestinal Worry Scales in pediatric patients with functional and organic gastrointestinal diseases in comparison to healthy controls. *Quality of Life Research*.
- Varni, J.W., Kay, M.T., Limbers, C.A., Franciosi, J.P., &&& Pohl, J.F. (2012). PedsQL™ Gastrointestinal Symptoms Module item development: Qualitative methods. *Journal of Pediatric Gastroenterology &&& Nutrition*, 54, 664-671.

#### Gastrointestinal Symptoms Scales:

- Varni, J.W., Bendo, C.B., Denham, J., Shulman, R.J., Self, M.M., Neigut, D.A., Nurko S., Patel, A.S, Franciosi, J.P., Saps, M., Verga, B., Smith, A., Yeckes, A., Heinz, N., Langseder, A., Saeed, S., Zacur, G.M., &&& Pohl, J.F. (2014). PedsQL™ Gastrointestinal Symptoms Module: Feasibility, reliability, and validity. *Journal of Pediatric Gastroenterology &&& Nutrition*, 59, 347–355.
- Varni, J.W., Bendo, C.B., Denham, J., Shulman, R.J., Self, M.M., Neigut, D.A., Nurko, S., Patel, A.S, Franciosi, J.P., Saps, M., Yeckes, A., Langseder, A., Saeed, S., &&& Pohl, J.F. (in press). PedsQL™ Gastrointestinal Symptoms Scales and Gastrointestinal Worry Scales in pediatric patients with functional and organic gastrointestinal diseases in comparison to healthy controls. *Quality of Life Research*.
- Varni, J.W., Kay, M.T., Limbers, C.A., Franciosi, J.P., &&& Pohl, J.F. (2012). PedsQL™ Gastrointestinal Symptoms Module item development: Qualitative methods. *Journal of Pediatric Gastroenterology &&& Nutrition*, 54, 664-671.

#### General Well-Being Scale:

- Varni, J.W., Seid, M., &&& Kurtin, P.S. (1999). Pediatric health-related quality of life measurement technology: A guide for health care decision makes. *Journal of Clinical Outcomes Management*, 6, 33-40.
- Hallstrand, T.S., Curtis, J.R., Aitken, M.L., &&& Sullivan, S.D. (2003). Quality of life in adolescents with mild asthma. *Pediatric Pulmonology*, 36, 536-543.

Healthcare Satisfaction Generic Module:

- Varni, J.W., Burwinkle, T.M., Dickinson, P., Sherman, S.A., Dixon, P., Ervice, J.A., Leyden, P.A. &&& Sadler, B.L. (2004). Evaluation of the built environment at a Children's Convalescent Hospital: Development of the Pediatric Quality of Life Inventory™ Parent and Staff Satisfaction Measures for pediatric health care facilities. *Journal of Developmental and Behavioral Pediatrics*, 2004; 25:10-25.
- Li, J., Yuan, L., Wu, Y., Luan, Y., &&& Hao, Y. (2013). The Chinese version of the Pediatric Quality of Life Inventory™ (PedsQL™) healthcare satisfaction generic module (version 3.0): Psychometric evaluation. *Health and Quality of Life Outcomes*, 11(1):113.
- de Souza, F.M., Molina, J., Terrerri, M.T., Hilário, M.O., &&& Len, CA. (2012). Reliability of the Pediatric Quality of Life Inventory - Healthcare Satisfaction Generic Module 3.0 version for the assessment of the quality of care of children with chronic diseases. *Journal of Pediatrics (Rio J)*, 88, 54-60.

Health Care Satisfaction Module specific for Hematology/Oncology:

- Varni, J.W., Quiggins, D.J.L., &&& Ayala, G.X. (2000). Development of the Pediatric Hematology/Oncology Parent Satisfaction survey. *Children's Health Care*, 29, 243-255.

Infant Scales:

- Varni, J.W., Limbers, C.A., Neighbors, K., Schulz, K., Lieu, J.E.C., Heffer, R.W., Tuzinkiewicz, K., Mangione-Smith, R., Zimmerman, J.J., &&& Alonso, E.M. (2011). The PedsQL™ Infant Scales: Feasibility, internal consistency reliability and validity in healthy and ill infants. *Quality of Life Research*, 20, 45-55.
- Grindler, D.J., Blank, S.J., Schulz, K.A., Witsell, D.L., &&& Lieu, J.E. (2014). Impact of otitis media severity on children's quality of life. *Otolaryngology-Head and Neck Surgery*, 151, 333-340.
- Bell, N., Kruse, S., Simons, R.K., &&& Brussoni, M. (2014). A spatial analysis of functional outcomes and quality of life outcomes after pediatric injury. *Injury Epidemiology*, 1:16, 1-10.

Multidimensional Fatigue Scale:

- Varni, J.W., Burwinkle, T.M., Katz, E.R., Meeske, K., &&& Dickinson, P. (2002). The PedsQL™ in pediatric cancer: Reliability and validity of the Pediatric Quality of Life Inventory™ Generic Core Scales, Multidimensional Fatigue Scale, and Cancer Module. *Cancer*, 94, 2090-2106.
- Varni, J. W., Beaujean, A., &&& Limbers, C. A. (2013). Factorial invariance of pediatric patient self-reported fatigue across age and gender: A multigroup confirmatory factor analysis approach utilizing the PedsQL™ Multidimensional Fatigue Scale. *Quality of Life Research*, 22, 2581-2594.

- Varni, J.W., Burwinkle, T.M., &&& Szer, I.S. (2004). The PedsQL<sup>TM</sup> Multidimensional Fatigue Scale in pediatric rheumatology: Reliability and validity. *Journal of Rheumatology*; 31, 2494-2500.
- Varni, J.W., &&& Limbers, C.A. (2008). The PedsQL<sup>TM</sup> Multidimensional Fatigue Scale in young adults: Feasibility, reliability and validity in a university student population. *Quality of Life Research*, 17, 105-114.
- Panepinto, J.A., Torres, S., Bendo, C.B., McCavit, T.L., Dinu, B., Sherman-Bien, S., Bemrich-Stolz, C., &&& Varni, J.W. (2014). PedsQL<sup>TM</sup> Multidimensional Fatigue Scale in sickle cell disease: Feasibility, reliability and validity. *Pediatric Blood &&& Cancer*, 61, 171–177.

#### Neurofibromatosis Type 1 Module:

- Nutakki, K., Hingtgen, C.M., Monahan, P., Varni, J.W., &&& Swigonski, N.L. (2013). Development of the adult PedsQL<sup>TM</sup> Neurofibromatosis Type 1 Module: Initial feasibility, reliability and validity. *Health and Quality of Life Outcomes*, 11:21, 1-9

#### Neuromuscular Module:

- Iannaccone, S.T., Hynan, L.S., Morton, A., Buchanan, R., Limbers, C.A., &&& Varni, J.W. (2009). The PedsQL<sup>TM</sup> in pediatric patients with Spinal Muscular Atrophy: Feasibility, reliability, and validity of the Pediatric Quality of Life Inventory<sup>TM</sup> Generic Core Scales and Neuromuscular Module. *Neuromuscular Disorders*, 19, 805-812.
- Davis, S.E., Hynan, L.S., Limbers, C.A., Andersen, C.M., Greene, M.C., Varni, J.W., &&& Iannaccone, S.T. (2010). The PedsQL<sup>TM</sup> in pediatric patients with Duchenne Muscular Dystrophy: Feasibility, reliability, and validity of the Pediatric Quality of Life Inventory<sup>TM</sup> Neuromuscular Module and Generic Core Scales. *Journal of Clinical Neuromuscular Disease*, 11, 97-109.

#### Oral Health Scale:

- Steele, M.M., Steele, R.G., &&& Varni, J.W. (2009). Reliability and validity of the PedsQL<sup>TM</sup> Oral Health Scale: Measuring the relationship between child oral health and health-related quality of life. *Children's Health Care*, 38, 228-224.

#### Pediatric Pain Coping Inventory<sup>TM</sup>:

- Varni, J.W., Waldron, S.A., Gragg, R.A., Rapoff, M.A., Bernstein, B.H., Lindsley, C.B., &&& Newcomb, M.D (1996). Development of the Waldron/Varni Pediatric Pain Coping Inventory. *Pain*, 67, 141-150.

#### Pediatric Pain Questionnaire:

- Varni, J.W., Thompson, K.L., &&& Hanson, V. (1987). The Varni/Thompson Pediatric Pain Questionnaire: I.

Chronic musculoskeletal pain in juvenile rheumatoid arthritis. *Pain*, 28, 27-38.

Present Functioning Visual Analogue Scales:

- Sherman, S.A., Eisen, S., Burwinkle, T.M., &&& Varni, J.W. (2006). The PedsQL<sup>™</sup> Present Functioning Visual Analogue Scales: Preliminary reliability and validity. *Health and Quality of Life Outcomes*, 4:75, 1-10.

Sickle Cell Disease Module:

- Panepinto, J.A., Torres, S., Bendo, C.B., McCavit, T.L., Dinu, B., Sherman-Bien, S., Bemrich-Stolz, C., &&& Varni, J.W. (2013). PedsQL<sup>™</sup> Sickle Cell Disease Module: Feasibility, reliability and validity. *Pediatric Blood &&& Cancer*, 60, 1338–1344.

- Panepinto, J.A., Torres, S., &&& Varni, J.W. (2012). Development of the PedsQL<sup>™</sup> Sickle Cell Disease Module items: Qualitative methods. *Quality of Life Research*, 21, 341-357.

Stem Cell Transplant Module:

- Lawitschka, A., Güclü, E.D., Varni, J.W., Putz, M., Wolff, D., Pavletic, S., Greinix, H., Peters, C., &&& Felder-Puig, R. (2014). Health-related quality of life in pediatric patients after allogeneic SCT: Development of the PedsQL<sup>™</sup> Stem Cell Transplant Module and results of a pilot study. *Bone Marrow Transplantation*, 49, 1093–1097.

Rheumatology Module:

- Varni, J.W., Seid, M., Knight, T.S., Burwinkle, T.M., Brown, J., &&& Szer, I.S. (2002). The PedsQL<sup>™</sup> in pediatric rheumatology: Reliability, validity, and responsiveness of the Pediatric Quality of Life Inventory<sup>™</sup> Generic Core Scales and Rheumatology Module. *Arthritis and Rheumatism*, 2002; 46: 714-725.

Transplant Module:

- Weissberg-Benchell, J., Zielinski, T.E., Rodgers, S., Greenley, R.N., Askenazi, D., Goldstein, S.L., Fredericks, E.M., McDiarmid, S., Williams, L., Limbers, C.A., Tuzinkiewicz, K., Lerret, S., Alonso, E.M., &&& Varni, J.W. (2010). Pediatric health-related quality of life: Feasibility, reliability and validity of the PedsQL<sup>™</sup> Transplant Module. *American Journal of Transplantation*, 10, 1677-1685.
